# Supplementary material
Source: Research Square preprint supplement (doi:10.21203/rs.3.rs-10117508/v1)
Supplement: Supplementary file 1 [file f6c6b1089a31cf3b37766418.docx]

Supplementary information

Quantifying discrepancies and improving consistency in Life Cycle Assessment tools, databases and methods with *rosetta*

Cédric Furrer1,2, Mélanie Douziech1, Jeroen Guinée2, Valerio Barbarossa2, Michael Martin3,4, Thomas Nemecek1, Joan Muñoz-Liesa*1,4

1 Agroscope, Life Cycle Assessment group, CH-8046 Zurich, Switzerland

2 Institute of Environmental Sciences (CML), Faculty of Science, Leiden University, Netherlands

3 IVL Swedish Environmental Research Institute, Stockholm, Sweden

4 Department of Sustainable Development, Sustainability Science and Engineering, School of Architecture and the Built Environment, Royal Institute of Technology (KTH), Sweden

*Corresponding author email: [joan.munozliesa@agroscope.admin.ch](mailto:joan.munozliesa@agroscope.admin.ch)

**Section S1: Structure and linking logic of LCI databases**

LCI databases consist of a set of technosphere processes representing interactions between human-made processes, which are linked to biosphere flows[[1]](#footnote-1) that represent interactions with the natural environment. Within an LCI database, technosphere processes are also often internally linked to other technosphere processes to correctly represent product supply chains. In the LCIA step, all technosphere processes are ultimately translated into biosphere flows which are characterized as defined by each LCIA method to compute environmental impacts. This requires 1) that biosphere flows used by LCIs are consistently linked to the software’s internal biosphere nomenclature and taxonomy. And 2) that software biosphere flows are associated to the correct CFs which are either mapped to the corresponding flows specified in LCIA methods or that are internally built from common group names (as done in Sphera, like e.g. metals). In practice, this means that a flow in a database referring to “water, lake” can be mapped to “water, lake, CH” (since the software might implement regionalized flows) which in turn maps to the flow “lake water, resources from water, CH” as specified in the LCIA method. Therefore, a direct mapping between biosphere flows across databases, software tools and LCIA methods might not always be straightforward because additional interpretation is required. Only when a consistent name mapping between technosphere processes, biosphere flows and LCIA methods exist, can database inventories be internally linked and thus be translated successfully into environmental impacts. Ensuring such internal consistency is fundamental for any LCI database and must be preserved in any LCA software.

**Section S2: Workflow validation**

To make sure the *rosetta* workflow performs as expected, we ran different validation assessments. First, to ensure ECOBW and BIOBW+LCIA were correctly imported, we computed environmental impacts of all datasets in ecoinvent v3.11 Cutt-off database using matrix calculations in a parallel workflow using Equation 1. We exported from SimaPro the process requirement matrix (A) together with the stressors’ matrix (S, containing the stressors intensities per unit of processes) and the characterization factors of EF v3.1 impact method. We calculated the matrix of impacts by processes (Dpro) to quantify the environmental impacts derived per each process (i.e., given a demand of 1 unit of each of the ecoinvent database processes) as follows:

Equation 1:

The resulting environmental impacts were compared with the corresponding values obtained using the Brightway calculation engine. In addition, results were cross-checked against the environmental impacts reported directly by ecoinvent. This double-validation approach made it possible to determine whether observed differences in environmental impacts between LCA tools originated from differences in implementation setups, rather than from rounding effects or other potential scripting errors.

Second, we validated the biosphere mapping that enables harmonizing LCA databases to a common ecoinvent background version. For this purpose, we used the resulting biosphere mapping between ecoinvent implementations in Brightway and SimaPro and calculated the LCIA scores in Brightway. Thus, we compared LCIA scores from the same ecoinvent v3.11 database using equivalent biosphere methods using the CFs from SimaPro biosphere and LCIA methods implementation to the Brightway framework. To evaluate the performance of the mapping, environmental impacts were computed and compared to ECOBW. The comparison showed nearly identical deviations to those reported in the results section, confirming the successful implementation of the workflow.

Table S1. Overview of file formats of biosphere flows and LCIA methods within specific software tools and corresponding data source.

|  |  | File format | |  |
| --- | --- | --- | --- | --- |
| Abbreviation | Software | Biosphere flows | LCIA method | Data source |
| BWBIO+LCIA | Brightway | XML file containing biosphere flows1 | Excel file with characterization factors2 | ecoQuery platform3 |
| SPBIO+LCIA | SimaPro | SimaPro LCIA CSV with biosphere flows and characterization factors | | SimaPro software4 |
| OLBIO+LCIA | OpenLCA | SimaPro LCIA CSV with biosphere flows and characterization factors | | OpenLCA software5 |
| 1 Version v3.11, file “*ElementaryExchanges.xml*” retrieved from ecoQuery platform (ecoinvent Centre 2026) | | | | |
| 2 Version v3.11, file “*LCIA Implementation 3.11.xlsx*” retrieved from ecoQuery platform (ecoinvent Centre 2026) | | | | |
| 3 SimaPro LCIA method file, retrieved from SimaPro software (PRé Consultants 2025) | | | | |
| 4 SimaPro LCIA method file, retrieved from OpenLCA software (Ciroth 2007) | | | | |

Table S2. Overview of the number of LCIs and biosphere flows from Brightway, OpenLCA and SimaPro software implementations. ECO = ecoinvent v3.11 Cut-off database as implemented in the Brightway (ECOBW), openLCA (ECOOL) and SimaPro (ECOSP) software.

|  |  | ECOBW | ECOOL | ECOSP |
| --- | --- | --- | --- | --- |
| Amount of ecoinvent LCIs |  | 25,412 | 25,412 | 28,626 |
| From which are obsolete |  | 0 | 0 | 3,214 |
|  |  |  |  |  |
| Amount of total biosphere flows in each software |  | 9,795 | 6,694 | 127,730* |
| From which are used in at least one ecoinvent dataset |  | 3,238 | 2,335 | 5,538 |
| From which are characterized in at least one LCIA method |  | 2,383 | 2,335 | 4,202 |
| From which are unique flows-compartments |  | 2,383 | 2,335 | 3,372 |
| From which are unique flows |  | 1,002 | 911 | 1,261 |
|  |  |  |  |  |
| * also includes biosphere flows originating from other LCI databases besides ecoinvent | | | | |

Table S3. Change of environmental impacts between different software implementations for the ecoinvent LCI database. SimaPro (ECOSP) and OpenLCA (ECOOL) each are compared to the Brightway implementation (ECOBW). The overall change in environmental impacts across the database is shown using the median factor of change (*FM*). Additionally, the share of LCIs that changed less than 5% (P<5%), more than 5% (P>5%), more than 20% (P>20%) and more than 50% (P>50%) are shown.

|  | **AD** | **ET** | **FE** | **CC** | **HTc** | **HTnc** | **IR** | **LU** | **ME** | **OD** | **PM** | **POF** | **RU** | **RUM** | **TE** | **WU** |
| --- | --- | --- | --- | --- | --- | --- | --- | --- | --- | --- | --- | --- | --- | --- | --- | --- |
|  |  |  |  |  |  |  |  |  |  |  |  |  |  |  |  |  |
| Change in SimaPro implementation (ECOSP) when compared to ECOBW | | | | | | | | | | | | | | | | |
| FM | 1 | 1 | 1 | 1 | 1 | 1 | 1 | 1 | 1 | 1 | 1 | 1 | 1 | -1.03 | 1 | -1.25 |
| P<5% | 100% | 98.8% | 100% | 100% | 93.5% | 94.3% | 100% | 100% | 100% | 95.1% | 100% | 100% | 100% | 67.6% | 100% | 18.8% |
| P>5% | 0% | 1.2% | 0% | 0% | 6.5% | 5.7% | 0% | 0% | 0% | 4.9% | 0% | 0% | 0% | 32.4% | 0% | 81.2% |
| P>20% | 0% | 0.5% | 0% | 0% | 2.6% | 1.5% | 0% | 0% | 0% | 0.9% | 0% | 0% | 0% | 13.9% | 0% | 54.0% |
| P>50% | 0% | 0.2% | 0% | 0% | 0.0% | 0.1% | 0% | 0% | 0% | 0.2% | 0% | 0% | 0% | 3.0% | 0% | 23.2% |
|  |  |  |  |  |  |  |  |  |  |  |  |  |  |  |  |  |
| Change in OpenLCA implementation (ECOOL) when compared to ECOBW | | | | | | | | | | | | | | | | |
| FM | 1 | 1 | 1 | 1 | 1 | 1 | 1 | 1 | 1 | 1 | -1.08 | 1 | 1 | 1 | 1 | 1 |
| P<5% | 100% | 94.5% | 100% | 100% | 53.5% | 77.6% | 100% | 100% | 100% | 100% | 29.6% | 100% | 100% | 100% | 100% | 100% |
| P>5% | 0% | 5.5% | 0% | 0% | 46.5% | 22.4% | 0% | 0% | 0% | 0% | 70.4% | 0% | 0% | 0% | 0% | 0% |
| P>20% | 0% | 2.6% | 0% | 0% | 21.3% | 8.1% | 0% | 0% | 0% | 0% | 47.0% | 0% | 0% | 0% | 0% | 0% |
| P>50% | 0% | 1.6% | 0% | 0% | 3.0% | 1.6% | 0% | 0% | 0% | 0% | 15.5% | 0% | 0% | 0% | 0% | 0% |
|  |  |  |  |  |  |  |  |  |  |  |  |  |  |  |  |  |

Table S4. Uncharacterized, cumulative LCI emissions from all ecoinvent v3.11 Cut-off datasets (1 unit) contained in the SimaPro (ECOSP) and Brightway (ECOBW) implementation. The ratio reflects the deviation from the Brightway implementation, with values > 1 indicating a higher emission in SimaPro compared to Brightway. Values < 1 indicate a higher emission in Brightway compared to SimaPro. The table also indicates which impact category characterizes the emissions. Impact categories shown: ET = Freshwater ecotoxicity; HTc/HTnc = Human toxicity, cancer/non-cancer; LU = Land use.

| **Name** | **Top category** | **Unit** | **SimaPro implementation** | **Brightway implementation** | **Ratio**  **(SimaPro / Brightway)** | **Characterized in LCIA method** |
| --- | --- | --- | --- | --- | --- | --- |
| 2,4-D, Dimethylamine salt | air | kg | 4.13E-06 | 1.28E-06 | 3.24 | ET |
| Aluminium (iii) | water | kg | 6022832058 | 10111202 | 595.66 | ET |
| Antimony, ion | water | kg | 1196654 | 115931 | 10.32 | ET, HTc, HTnc |
| Arsenic, ion | water | kg | 9476447 | 240286 | 39.44 | ET, HTc, HTnc |
| Barium (ii) | water | kg | 52094091 | 1851126 | 28.14 | ET, HTc, HTnc |
| Benzo(g,h,i)perylene | air | kg | 5706 | 1.37 | 4165.64 | Htc |
| Beryllium (ii) | air | kg | 1381 | 1165 | 1.19 | ET, HTc, HTnc |
| Beryllium (ii) | water | kg | 721611 | 1785 | 404.26 | ET, HTc, HTnc |
| Boron | water | kg | 11921728 | 1175547 | 10.14 | ET |
| Bromine | water | kg | 3620274 | 1623845 | 2.23 | ET, HTnc |
| Cadmium (ii) | water | kg | 1164140 | 69896 | 16.66 | ET, HTc, HTnc |
| Chloride | water | kg | 4630547749 | 3892099581 | 1.19 | ET |
| Chromium (vi) | water | kg | 67207313 | 515880 | 130.28 | ET, HTc, HTnc |
| Cobalt (ii) | water | kg | 20251574 | 64571 | 313.63 | ET |
| Copper, ion | water | kg | 256873001 | 438168 | 586.24 | ET, HTnc |
| Fluoride | water | kg | 104069198 | 1605567 | 64.82 | ET, HTnc |
| Fluorine | air | kg | 158386 | 54230 | 2.92 | ET, HTnc |
| Hydrogen sulfide | water | kg | 65805676 | 7943078 | 8.28 | ET |
| Iodide | water | kg | 1532906 | 1220659 | 1.26 | ET |
| Iron, ion | air | kg | 5307811 | 3435758 | 1.54 | ET |
| Iron, ion | water | kg | 4185400999 | 132967302 | 31.48 | ET |
| Lead (ii) | water | kg | 37034370 | 181417 | 204.14 | ET, HTc, HTnc |
| Magnesium | air | kg | 1154733 | 981557 | 1.18 | ET, HTnc |
| Magnesium | water | kg | 3342570782 | 87352044 | 38.27 | ET, HTnc |
| Manganese (ii) | air | kg | 373923 | 335009 | 1.12 | ET |
| Manganese (ii) | water | kg | 265531820 | 2462527 | 107.83 | ET |
| Mercury (ii) | water | kg | 153107 | 7669 | 19.97 | ET, HTc, HTnc |
| Molybdenum (vi) | air | kg | 58013 | 55035 | 1.05 | ET, HTnc |
| Molybdenum (vi) | water | kg | 3621370 | 530709 | 6.82 | ET, HTnc |
| Nickel (ii) | water | kg | 58642655 | 485537 | 120.78 | ET, HTc, HTnc |
| Selenium (iv) | water | kg | 1129431 | 48013 | 23.52 | ET |
| Silicon | air | kg | 3338059 | 2954004 | 1.13 | ET, HTnc |
| Silicon | water | kg | 13687488816 | 66672668 | 205.29 | ET, HTnc |
| Silver (i) | air | kg | 310 | 54.17 | 5.73 | ET, HTnc |
| Silver (i) | water | kg | 1810546 | 1947 | 929.78 | ET, HTnc |
| Strontium (ii) | water | kg | 122133692 | 8791207 | 13.89 | ET |
| Thallium (i) | water | kg | 1245122 | 971 | 1282.68 | ET, HTnc |
| Transformation, to annual crop, irrigated | natural resource | m2 | 3774284 | 7548555 | 0.50 | LU |
| Transformation, to permanent crop, irrigated, intensive | natural resource | m2 | 913 | 1825 | 0.50 | LU |
| Transformation, to shrub land, sclerophyllous | natural resource | m2 | 27336960 | 74730667 | 0.37 | LU |
| Tungsten | air | kg | 693 | 1.51 | 457.71 | ECO |
| Tungsten | water | kg | 2405421 | 1277365 | 1.88 | ECO |
| Vanadium (v) | water | kg | 28250086 | 230515 | 122.55 | ET, HTnc |
| Zinc (ii) | water | kg | 84539972 | 2055222 | 41.13 | ET, HTnc |

Table S5. Number, median and mean of characterization factors between the EF v3.1 LCIA method of different software implementations. Impact categories shown: AD = Acidification; ET = Freshwater ecotoxicity; FE = Freshwater eutrophication; CC = Climate change; HTc/HTnc = Human toxicity, cancer/non-cancer; IR = Ionizing radiation; LU = Land use; ME = Marine eutrophication; OD = Ozone depletion; PM = Particulate matter; POF = Photochemical ozone formation; RU = Resource use, fossils; RUM = Resource use, minerals & metals; TE = Terrestrial eutrophication; WU = Water use.

|  | **Brightway** | | |  | **SimaPro** | | |  | **OpenLCA** | | |
| --- | --- | --- | --- | --- | --- | --- | --- | --- | --- | --- | --- |
| **Method** | **n** | **median** | **mean** |  | **n** | **median** | **mean** |  | **n** | **median** | **mean** |
| AD | 17 | 1.31 | 1.50 |  | 18 | 1.31 | 1.49 |  | 14 | 1.22 | 1.46 |
| ET | 2231 | 1409.4 | 14048406 |  | 2226 | 923.5 | 13195172 |  | 1994 | 1534.3 | 12980302 |
| FE | 11 | 0.33 | 0.44 |  | 12 | 0.325 | 0.37 |  | 10 | 0.33 | 0.45 |
| ME | 29 | 0.304 | 0.33 |  | 24 | 0.304 | 0.37 |  | 23 | 0.304 | 0.34 |
| TE | 14 | 4.26 | 6.74 |  | 11 | 4.26 | 7.72 |  | 11 | 4.26 | 6.68 |
| CC | 92 | 160 | 3351 |  | 91 | 79.4 | 3371 |  | 74 | 160.5 | 3388 |
| HTc | 352 | 9.8202E-07 | 1.13 |  | 614 | 1.3311E-08 | 0.65 |  | 290 | 1.36E-06 | 0.87 |
| HTnc | 1883 | 4.5275E-07 | 0.00073 |  | 1878 | 3.2514E-07 | 0.00073 |  | 1678 | 4.43E-07 | 0.00072 |
| IR | 79 | 0.0429 | 1.98 |  | 62 | 0.04075 | 1.78 |  | 72 | 0.0408 | 2.17 |
| LU | 121 | 50.946 | 148.4 |  | 118 | 50.946 | 151.8 |  | 121 | 50.946 | 148.4 |
| OD | 20 | 0.72 | 2.27 |  | 23 | 0.72 | 1.39 |  | 17 | 0.72 | 1.73 |
| PM | 24 | 0.000008 | 4.20E-05 |  | 25 | 0.000008 | 3.63E-05 |  | 20 | 0.000008 | 3.53E-05 |
| POF | 166 | 0.534 | 0.61 |  | 168 | 0.5045 | 0.608 |  | 126 | 0.534 | 0.62 |
| RU | 7 | 36 | 80021 |  | 10 | 35.9 | 56026 |  | 7 | 36 | 80021 |
| RUM | 60 | 3.83E-05 | 1.65 |  | 44 | 0.000053 | 2.24 |  | 60 | 3.83E-05 | 1.65 |
| WU | 4 | 42.95 | 42.95 |  | 803 | 6.98 | 9.62 |  | 3 | 42.95 | 42.95 |


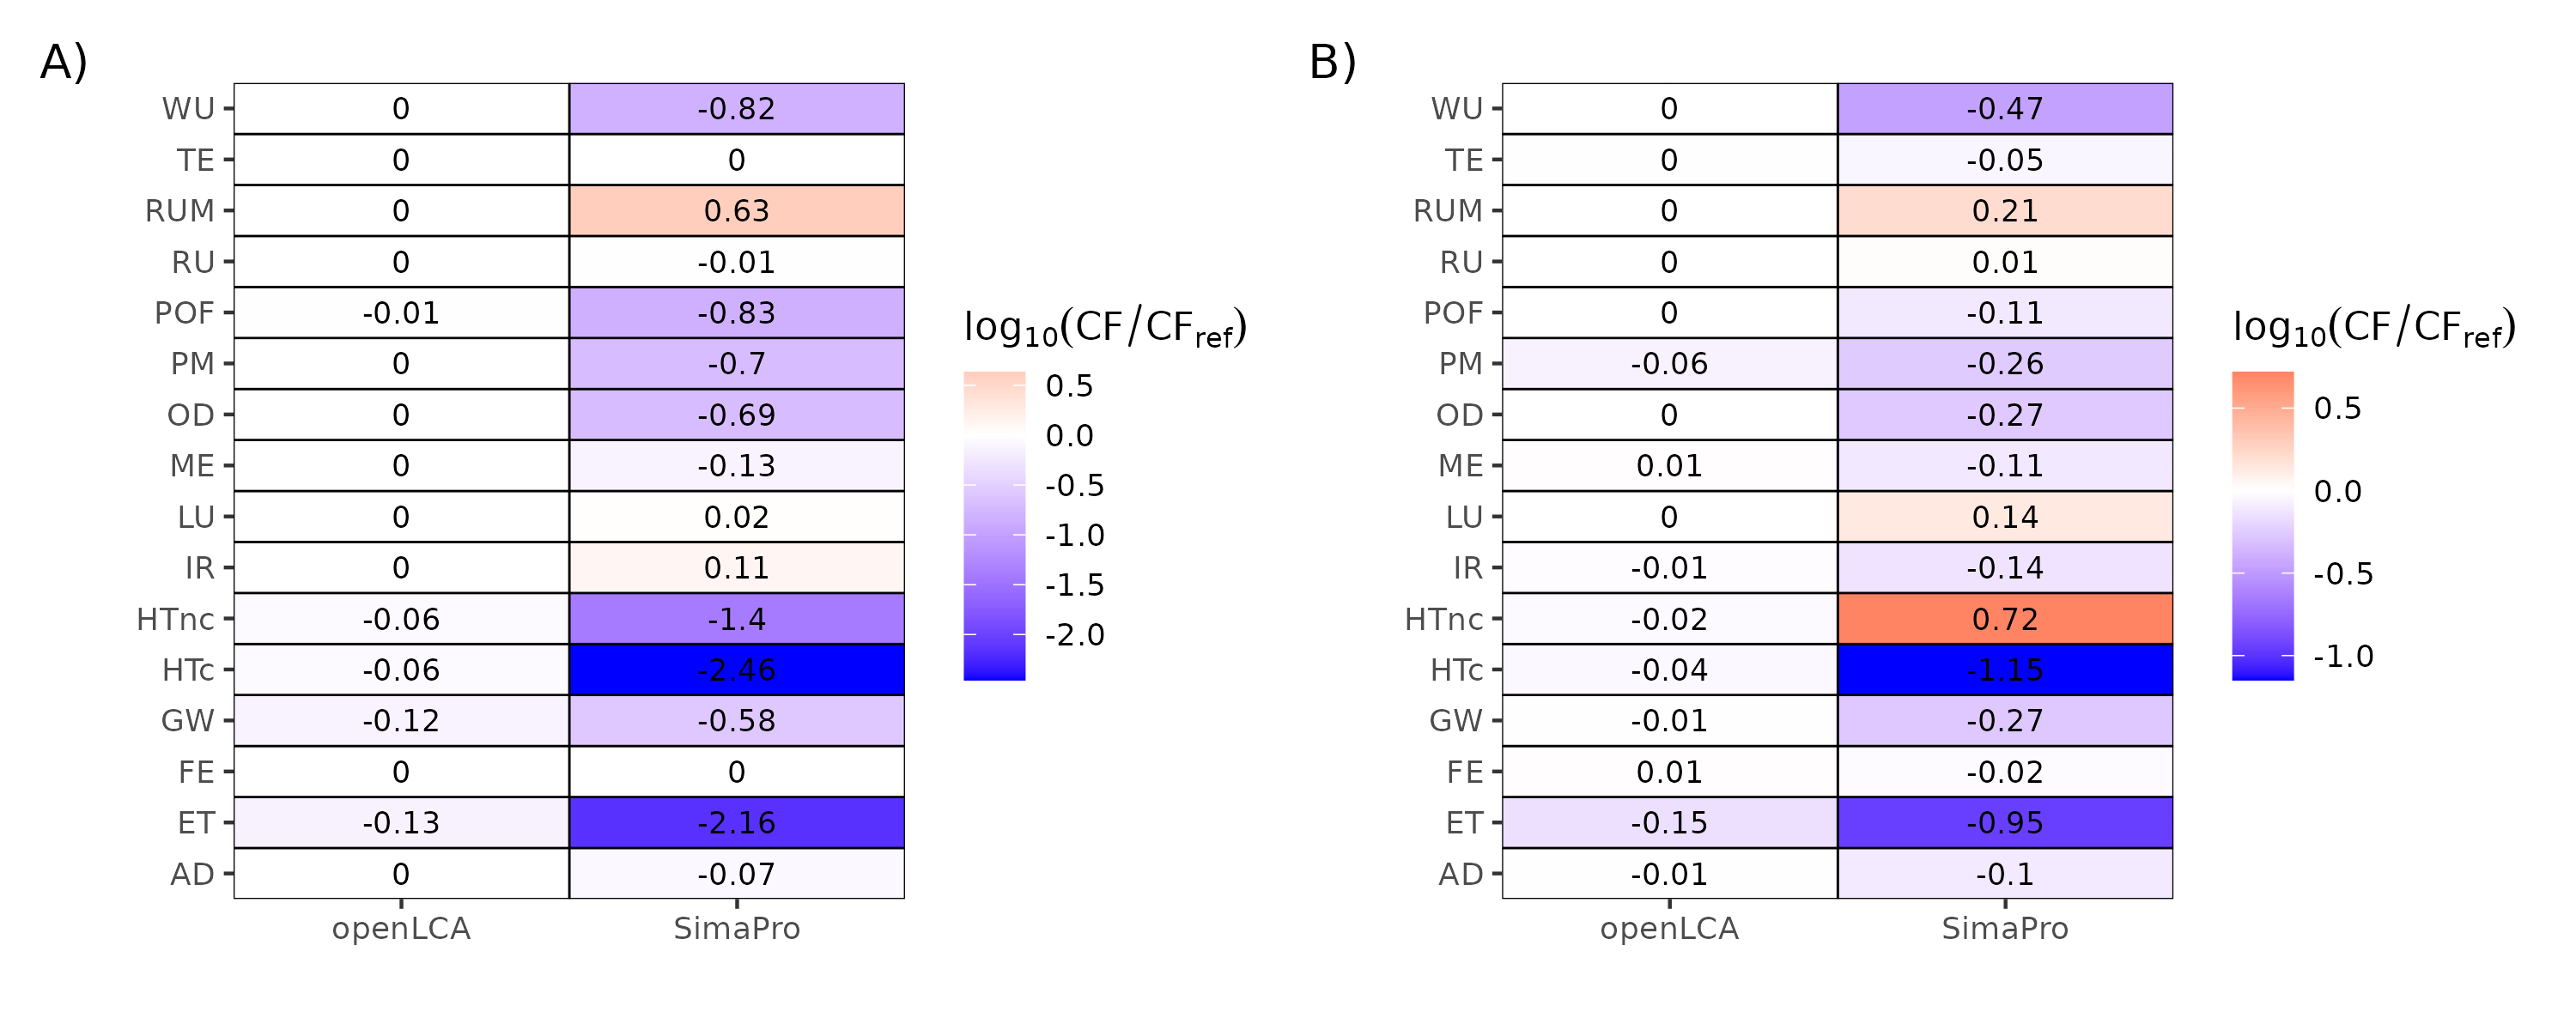


Figure S1. Overview of median (A) and mean (B) logarithmic change of characterization factors from the SimaPro to the Brightway implementation and OpenLCA to the Brightway implementation. Impact categories shown: AD = Acidification; ET = Freshwater ecotoxicity; FE = Freshwater eutrophication; CC = Climate change; HTc/HTnc = Human toxicity, cancer/non-cancer; IR = Ionizing radiation; LU = Land use; ME = Marine eutrophication; OD = Ozone depletion; PM = Particulate matter; POF = Photochemical ozone formation; RU = Resource use, fossils; RUM = Resource use, minerals & metals; TE = Terrestrial eutrophication; WU = Water use.

Table S6. Deviation of environmental impacts from ecoinvent LCI with SimaPro nomenclature to the original (Brightway) implementation. Change of environmental impacts between the ecoinvent LCI database with SimaPro nomenclature to the original (Brightway) implementation. The overall change in environmental impacts across the database is shown using the median factor of change (*FM*). Additionally, the share of LCIs that changed less than 5% (P<5%), more than 5% (P>5%), more than 20% (P>20%) and more than 50% (P>50%) are shown.

|  | **AD** | **CC** | **ET** | **FE** | **HTc** | **HTnc** | **IR** | **LU** | **ME** | **OD** | **PM** | **POF** | **RU** | **TE** | **RUM** | **WU** |
| --- | --- | --- | --- | --- | --- | --- | --- | --- | --- | --- | --- | --- | --- | --- | --- | --- |
| FM | 1 | 1 | 1 | 1 | 1 | 1 | 1 | 1 | 1 | 1 | 1 | 1 | 1 | 1 | -1.03 | 30.16 |
| P<5% | 100% | 100% | 98.8% | 100% | 93.4% | 94.3% | 100% | 96.6% | 100% | 95.1% | 100% | 100% | 100% | 100% | 67.6% | 8.6% |
| P>5% | 0% | 0% | 1.2% | 0% | 6.6% | 5.7% | 0% | 3.4% | 0% | 4.9% | 0% | 0% | 0% | 0% | 32.4% | 91.4% |
| P>20% | 0% | 0% | 0.5% | 0% | 2.6% | 1.5% | 0% | 1.9% | 0% | 0.9% | 0% | 0% | 0% | 0% | 13.9% | 90.8% |
| P>50% | 0% | 0% | 0.2% | 0% | 0.0% | 0.1% | 0% | 1.4% | 0% | 0.2% | 0% | 0% | 0% | 0% | 3.0% | 89.5% |
|  |  |  |  |  |  |  |  |  |  |  |  |  |  |  |  |  |

Table S7. Summary of the total number of LCIs and ecoinvent LCI copies used in the three investigated food LCI databases, before and after updating them to ecoinvent v3.11. Column suffixes denote the original ("orig") and updated ("upd") versions of each database: AGF = Agri-footprint; AGB = AGRIBALYSE®; WFLDB = World Food LCA Database.

|  | AGForig | AGFupd | AGBorig | AGBupd | WFLDBorig | WFLDBupd |
| --- | --- | --- | --- | --- | --- | --- |
| Total number of LCIs | 5,062 | | 21,612 | | 3,489 | |
| ecoinvent LCI copies | 109 | | 1,885 | | 1,150 | |
| Implemented ecoinvent background version | V3.10.1 | V3.11 | V3.9.1 | V3.11 | V3.5 | V3.11 |
| ... updated to new LCI version | n.a. | 109 | n.a. | 1,872 | n.a. | 1,139 |
| … updated using direct mapping | n.a. | 41 | n.a. | 1,463 | n.a. | 840 |
| … updated using correspondence files | n.a. | 2 | n.a. | 399 | n.a. | 266 |
| … updated using LLM | n.a. | 0 | n.a. | 0 | n.a. | 8 |
| … updated using custom mapping | n.a. | 66 | n.a. | 10 | n.a. | 25 |
| ... not updated | 109 | 0 | 1,885 | 13 | 1,150 | 11 |
|  |  |  |  |  |  |  |

1. Note that we follow the terminology of “biosphere flow” rather than the ISO-defined term “elementary flows”, since it is more commonly used in LCA software implementations. [↑](#footnote-ref-1)
